# Supplementary material for: COVID-19 vaccine misinformation in English-language news media: retrospective cohort study
Source: HighWire-hosted journal article supplement (doi:10.1136/bmjopen-2021-058956), 2022-06-01
Supplement: bmjopen-2021-058956supp001_data_supplement.pdf [file bmjopen-2021-058956supp001_data_supplement.pdf]

**Supplementary Material 1: Top 100 News Outlets with the Largest Reach**

abc.net.au  
abcnews.go.com  
aol.com  
apnews.com  
bbc.com  
bloomberg.com  
businessinsider.com  
cbc.ca  
cbsnews.com  
channelnewsasia.com  
chron.com  
cnbc.com  
cnet.com  
cnn.com  
ctvnews.ca  
dailymail.co.uk  
digitaltrends.com  
economictimes.indiatimes.com  
eluniversal.com.mx  
espn.com  
express.co.uk  
finance.yahoo.com  
fool.com  
forbes.com  
foxbusiness.com  
foxnews.com  
ft.com  
globalnews.ca  
hindustantimes.com  
houstonchronicle.com  
huffpost.com  
independent.co.uk  
indianexpress.com  
indiatimes.com  
indiatoday.in  
insider.com  
investing.com  
investopedia.com  
itv.com  
jagranjosh.com  
jpost.com  
latimes.com  
m.dailyhunt.in

m.economictimes.com  
marketwatch.com  
mashable.com  
medicalnewstoday.com  
medium.com  
metro.co.uk  
mirror.co.uk  
msn.com  
nationalinterest.org  
nbcnews.com  
ndtv.com  
news.abs-cbn.com  
news.yahoo.com  
news18.com  
newsbreak.com  
newsweek.com  
newyorker.com  
npr.org  
nypost.com  
nytimes.com  
nzherald.co.nz  
pbs.org  
politico.com  
republicworld.com  
reuters.com  
rt.com  
scmp.com  
sfgate.com  
slate.com  
smh.com.au  
sports.yahoo.com  
sputniknews.com  
standard.co.uk  
straitstimes.com  
stuff.co.nz  
techradar.com  
telegraph.co.uk  
theatlantic.com  
theguardian.com  
thehill.com  
thehindu.com  
thesun.co.uk  
theverge.com  
time.com

timesnownews.com  
timesofindia.indiatimes.com  
timesofisrael.com  
ucnews.in  
usatoday.com  
usnews.com  
vice.com  
washingtonpost.com  
westernjournal.com  
wsj.com  
yahoo.com

## Supplementary Material 2: Study Boolean Search String

((("COVID-19" OR coronavirus OR COVID OR "sars-cov-2" OR "Severe acute respiratory syndrome coronavirus" OR "betacoronavirus") AND (vaccine OR vaccines OR vaccinations OR vaccination OR vaccinated OR vaccinates OR vaccinate OR immunization OR immunisation OR immunized)) AND ("democrat hoax" OR "democratic hoax" OR "democratic party hoax" OR "vaccine win" OR "vaccine after the election" OR "withheld vaccine" OR "magically vanish" OR "magically disappear" OR "developed too quickly" OR "developed too fast" OR "developed too soon" OR "potential error" OR "potential errors" OR "cut corners" OR "corner cutting" OR "corners cut" OR "skipped steps" OR "political pressure" OR "rushed vaccine" OR "bell's palsy" OR "bells palsy" OR "facial paralysis" OR "fainting" OR "syncope" OR "dangerous side effect" OR "dangerous side effects" OR "infertility" OR "fertility" OR "5G" OR "VAERS" OR "VEARS" OR "dangerous chemical" OR "dangerous chemicals" OR "harmful ingredients" OR "contains harmful" OR "poison vaccine"~5 OR "poisonous vaccine"~5 OR "toxic vaccine" OR "thimerosal" OR "polyethylene glycol" OR PEG OR "nanoparticles" OR "aluminum" OR "preservative" OR "formaldehyde" OR "untested vaccine" OR "vaccine not tested" OR "has not been tested" OR "few tests vaccine"~5 OR "lack of testing vaccine"~5 OR "no testing" OR "skipped steps" OR "skipped step" OR "lack of safety" OR "lack of data" OR "sacrifice safety" OR "sacrificed safety" OR "industry sponsored" OR "mark of the beast" OR "satanic" OR "666" OR "satanism" OR "satan" OR "anti-christ" OR "antichrist" OR "vaccine give COVID"~3 OR "vaccine give coronavirus"~3 OR "vaccine transmits coronavirus" OR "vaccine transmits covid" OR "vaccine induced"~3 OR "vaccine-induced" OR "microchip" OR "microchipping" OR "microchips" OR "microchipped" OR "tracking chip" OR "tracking chips" OR "contains chip" OR "injected chip" OR "inject chip"~5 OR "injected chips" OR "injected tracking" OR "inject tracking" OR "inject tracker" OR "injected tracker" OR "contains tracker" OR "doctors paid extra" OR "doctor kickback"~5 OR "doctors kickback"~5 OR "doctors kickback"~5 OR "doctors kickbacks"~5 OR "doctors push vaccines" OR "doctors profit"~3 OR "paid per vaccine" OR "conflict of interest" OR "shills" OR "shill" OR "paid by pharma" OR "depopulation" OR "population control" OR "eugenics" OR "regulate fertility" OR "regulates fertility" OR "control fertility" OR "controls fertility" OR "population management" OR "depopulation vac" OR "depopulate" OR "gates agenda" OR ("vaccines kill people" OR "vaccine deaths"~2 OR "vaccine death"~2 OR "allergic reaction death"~3 NOT "death toll") OR "fetal vaccine" OR "fetus vaccine"~5 OR "fetuses vaccine" OR "abortion vaccine"~5 OR "aborted vaccine"~5 OR "fetal cells" OR "HEK293" OR "HEK-239" OR "HEK 239" OR "kidney cells" OR "embryonic kidney" OR "fetal cell line" OR "Epstein-Barr" OR "better than vaccinating" OR "better than the vaccine" OR "instead of vaccine" OR "instead of vaccinating" OR "miracle cure" OR "alternative cure" OR "other cure" OR "better than vaccinations" OR "Tuskegee" OR "human experiment" OR "human experimentation" OR "unethical test" OR "unethical testing" OR "medical experiment" OR "medical experiments" OR "medical experimentation" OR "alter DNA" OR "alters DNA" OR "Change DNA" OR "changes DNA" OR "vaccine inhuman"~5 OR "not human" OR "DNA-altering" OR "autism vaccine"~5 OR "autistic vaccine"~5 OR "autism vaccinate"~5 OR "autistic vaccinate" OR "autism vaccination" OR "autistic vaccination" OR "cause autism" OR "causes autism" OR "transmits autism" OR "gives autism" OR "99.9982%" OR "naturally acquired immunity" OR "200 reinfections" OR "natural immunity better" OR "natural immunity preferable"))

**Supplementary Material 3: Definitions of misinformation categories and example articles**

| Misinformation Category  | Definition                                                                                                                                                                      | Example Articles                                                                                                                        | Primary Theme   Subtheme            |
|--------------------------|---------------------------------------------------------------------------------------------------------------------------------------------------------------------------------|-----------------------------------------------------------------------------------------------------------------------------------------|-------------------------------------|
| Fact-Checking            | Article provides fact-checking information to counter COVID-19 vaccine misinformation                                                                                           | <a href="#">Wave of new COVID-19 cases crashes across U.S. and Europe as winter looms</a>                                               | Development   Not Tested Properly   |
|                          |                                                                                                                                                                                 | <a href="#">Chief Scientist of Quebec: We trust science to help us tackle COVID-19</a>                                                  | Safety   General                    |
|                          |                                                                                                                                                                                 | <a href="#">AP FACT CHECK: Trump distorts military role in vaccines</a>                                                                 | Development   General               |
| Refers to Misinformation | Article makes passing mention of COVID-19 vaccine misinformation without explicitly fact checking; articles about the "infodemic" without fact checking fall into this category | <a href="#">YouTube Suspends, Demonetizes Donald Trump's Favorite TV News Network Over COVID-19 Misinformation</a>                      | Alternatives   Miracle Cures        |
|                          |                                                                                                                                                                                 | <a href="#">Coronavirus: Social media firms 'only taking down 2%' of posts containing anti-vaccine misinformation, report finds</a>     | Conspiracy Theories   General       |
|                          |                                                                                                                                                                                 | <a href="#">Twitter Faces a Trumpless Future</a>                                                                                        | Alternatives   Miracle Cures        |
| Primary Misinformation   | Article supports misinformation regarding the COVID-19 vaccine(s)                                                                                                               | <a href="#">Trump expects Covid-19 vaccines will be available for 'every American' by April 2021</a>                                    | Political & Financial   General     |
|                          |                                                                                                                                                                                 | <a href="#">YouTube removes lockdown-sceptical interview with renowned immunologist Dr Mike Yeadon for 'violating terms of service'</a> | Alternatives   Natural Immunity     |
|                          |                                                                                                                                                                                 | <a href="#">The Perils of Vaccine Messianism</a>                                                                                        | Development   Developed Too Quickly |
